# Supplementary material for: Hyomental distance measured by ultrasound for size selection of laryngeal mask airway in female patients: a randomized controlled study
Source: Research Square preprint supplement (doi:10.21203/rs.3.rs-152376/v1), 2021-01-25
Supplement: Supplementary file 1 [file dd2b503c75bb927ea5999258.docx]

|  | **Item NO** | | **Checklist item** | **Reported on page NO** |
| --- | --- | --- | --- | --- |
| Title and abstract | | | | |
|  | 1a | ldentification as a randomised trial in the title | | 1 |
|  | 1b | Structured summary of trial design, methods, results, and conclusions (for specific guidance see CONSORT for abstracts | | P8 figure2 |
| Introduction | | | | |
| Background and objectives | 2a | Scientific background and explanation of rationale | | 4 |
|  | 2d | Specific objectives or hypotheses | | 4 |
| Methods | | | | |
| Trial design | 3a | Description of trial design (such as parallel, factorial) including allocation ratio | | 5 |
|  | 3b | Important changes to methods after trial commencement (such as eligibility criteria), with reasons | | 6 |
| Participants | 4a | Eligibility criteria for participants | | 4 |
|  | 4b | Settings and locations where the data were collected | | 6 |
| Interventions | 5 | The interventions for each group with sufficient details to allow replication, including how and when they were a actually administered | | 6-7 |
| Outcomes | 6a | Completely defined pre- specified primary and secondary outcome measures, including how and whenthey were assessed | | 7 |
|  | 6b | Any changes to trial outcomes after the trial commenced, with reasons | | 7 |
| Sample size | 7a | How sample size was determined | | 7 |
|  | 7b | When applicable, explanation of any interim analyses and stopping guidelines | | 7 |
| Randomisation | | | | |
| Sequence generation | 8a | Method used to generate the random allocation sequence | | 6 |
|  | 8b | Type of randomisation; details of any restriction (such as blocking and block size) | | 6 |
| Allocation concealment mechanism | 9 | Mechanism used to implement the random allocation sequence (such as sequentially numbered containers), describing any steps taken to conceal the sequence until interventions were assigned | | 6 |
| Implementation | 10 | Who generated the random allocation sequence, who enrolled participants, and who assigned participants to interventions | | 6 |
| Blinding | 11a | If done, who was blinded after assignment to interventions (for example, participants, care providers, those assessing outcomes) and how | | 6 |
|  | 11b | If relevant, description of the similarity of interventions | | 6-7 |
| Statistical methods | 12a | Statistical methods used to compare groups for primary and secondary outcomes | | 7 |
|  | 12b | Methods for additional analyses, such as subgroup analyses and adjusted analyses | | 7 |
| Results | | | | |
| Participant flow (a diagram is strongly recommended) | 13a | For each group, the numbers of participants who were randomly assigned, received intended treatment | | 8 |
|  | 13b | For each group, losses and exclusions after randomisation, together with reasons | | 8 |
| Recruitment | 14a | Dates defining the periods of recruitment and follow-up | | 4 |
|  | 14b | Why the trial ended or was stopped | | 8 |
| Baseline data | 15 | A table showing baseline demographic and clinical characteristics for each group | | 8 |
| Numbers analysed | 16 | For each group, number of participants (denominator) included in each analysis and whether the analysis was by original assigned groups | | 8-9 |
| Outcomes and estimation | 17a | For each primary and secondary outcome, results for each group, and the estimated effect size and itsprecision (such as 95% confidence interval) | | 8-9 |
|  | 17b | For binary outcomes, presentation of both absolute and relative effect sizes is recommended | | none |
| Ancillary analyses | 18 | Results of any other analyses performed, including subgroup analyses and adjusted analyses, distinguishing pre-specified from exploratory | | 9 |
| Harms | 19 | All important harms or unintended effects in each group (for specific guidance see CONSORT for harms [28]) | | N/A |
| Discussion | | | | |
| Limitations | 20 | Trial limitations, addressing sources of potential bias, imprecision, and, if relevant, multiplicity of analyses | | 11 |
| Generalisability | 21 | Generalisability (external validity, applicability) of the trial findings | | 11 |
| Interpretation | 22 | Interpretation consistent with results, balancing benefits and harms, and considering other relevant evidence | | 10 |
| Other information | | | | |
| Registration | 23 | Registration number and name of trial registry | | 4 |
| Protocol | 24 | Where the full trial protocol can be accessed, if available | | none |
| Funding | 25 | Sources of funding and other support (such as supply of drugs), role of funders | | 12 |
